# Supplementary material for: Effects of chemical surface pretreatments on the surface roughness and shear bond strength of fiber post-resin cement interfaces: a preliminary in vitro study
Source: PeerJ. 2025 Aug 11;13:e19853. doi: 10.7717/peerj.19853 (PMC12352417; doi:10.7717/peerj.19853)
Supplement: Supplemental Information 1 [file peerj-13-19853-s001.xlsx]

## Sheet: Sayfa1
Groups (1-10)	Shear Bond Strength Values	Surface Roughness Values
Group1-1	22.45	0.473
Group1-2	18.32	0.482
Group1-3	18.23	0.554
Group1-4	12.34	0.782
Group1-5	18.34	0.738
Group1-6	21.32	0.743
Group1-7	16.23	0.637
Group1-8	15.45	0.587
Group1-9	12.26	0.583
Group1-10	13.34	0.431
Group 2-1	15.2	0.599
Group 2-2	16.3	0.669
Group 2-3	17.48	0.556
Group 2-4	17.65	0.531
Group 2-5	14.36	0.352
Group 2-6	19.53	0.518
Group 2-7	18.42	0.451
Group 2-8	17.43	0.388
Group 2-9	24.72	0.509
Group 2-10	18.67	0.543
Group 3-1	17.63	0.826
Group 3-2	23.04	0.98
Group 3-3	18.41	0.827
Group 3-4	15.44	0.678
Group 3-5	13.3	0.671
Group 3-6	23.25	0.974
Group 3-7	23.78	0.631
Group 3-8	20.92	1.003
Group 3-9	15.51	0.929
Group 3-10	18.77	0.785
Group 4-1	19.22	0.737
Group 4-2	28.54	1.017
Group 4-3	18.16	0.643
Group 4-4	27.67	0.705
Group 4-5	27.68	0.879
Group 4-6	31.32	0.754
Group 4-7	14.62	1.127
Group 4-8	22.48	1.114
Group 4-9	12.55	0.815
Group 4-10	25.01	0.659
Group 5-1	17.27	0.754
Group 5-2	15.56	0.661
Group 5-3	16.58	0.797
Group 5-4	28.2	1.024
Group 5-5	19.28	0.561
Group 5-6	25.74	0.341
Group 5-7	21.69	0.233
Group 5-8	13.77	0.308
Group 5-9	20.4	0.454
Group 5-10	34.35	0.704
